# Supplementary material for: Association of In-Ear Device Use With Communication Quality Among Individuals Wearing Personal Protective Equipment in a Simulated Operating Room
Source: PubMed Central journal article supplement (PMC8056284; doi:10.1001/jamanetworkopen.2021.6857), 2021-04-19
Supplement: jamanetwopen-e216857-s001.pdf [file jamanetwopen-e216857-s001.pdf]

## Supplementary Online Content

Nguyen DL, Kay-Rivest E, Tewfik MA, Hier M, Lehmann A. Association of in-ear device use with communication quality among individuals wearing personal protective equipment in a simulated operating room. *JAMA Netw Open*. 2021;4(4):e216857. doi:10.1001/jamanetworkopen.2021.6857

**eTable 1.** Pairwise Comparisons for the Modified Rhyme Test (MRT)

**eTable 2.** Pairwise Comparisons for AzBio Sentence Test (AzBio)

**eTable 3.** Pairwise Comparisons for NASA Task Load Index (NASA-TLX)

**eTable 4.** Completed Conditions for Each Participant

This supplementary material has been provided by the authors to give readers additional information about their work.

**eTable 1.** Pairwise Comparisons for the Modified Rhyme Test (MRT)

|                              | <b>Score Difference,<br/>% points</b> | <b>95% Confidence<br/>Interval</b> | <b>P-value</b> |
|------------------------------|---------------------------------------|------------------------------------|----------------|
| HFE, Unaided – N95, Unaided  | -44.1                                 | -55.7 to -33.1                     | <0.001         |
| HFE, Unaided – PAPR, Unaided | -26.2                                 | -37.0 to -15.4                     | <0.001         |
| HFE, Unaided – HFE, Aided    | -37.7                                 | -47.3 to -28.1                     | <0.001         |
| HFE, Unaided – N95, Aided    | -43.3                                 | -54.6 to -32.0                     | <0.001         |
| HFE, Unaided – PAPR, Aided   | -41.2                                 | -52.0 to -30.4                     | <0.001         |
| N95, Unaided – PAPR, Unaided | 18.2                                  | 6.0 to 30.3                        | <0.001         |
| N95, Unaided – HFE, Aided    | 6.7                                   | -4.6 to 17.9                       | 0.691          |
| N95, Unaided – N95, Aided    | 1.1                                   | -11.2 to 13.5                      | 1.000          |
| N95, Unaided – PAPR, Aided   | 3.2                                   | -8.9 to 15.3                       | 1.000          |
| PAPR, Unaided – HFE, Aided   | -11.5                                 | -22.3 to -0.7                      | 0.028          |
| PAPR, Unaided – N95, Aided   | -17.1                                 | -29.2 to -4.9                      | 0.001          |
| PAPR, Unaided – PAPR, Aided  | -15.0                                 | -26.7 to -3.3                      | 0.004          |
| HFE, Aided – N95, Aided      | -5.6                                  | -16.8 to 5.7                       | 0.890          |
| HFE, Aided – PAPR, Aided     | -3.5                                  | -14.3 to 7.3                       | 0.998          |
| N95, Aided – PAPR, Aided     | 2.1                                   | -10.1 to 14.2                      | 1.000          |

Abbreviations: PAPR, Powered Air Purifying Respirator; HFE, half-face elastomeric. Unaided: Tested without the use of the in-ear communication device. Aided: Tested with the use of the in-ear communication device.

**eTable 2.** Pairwise Comparisons for AzBio Sentence Test (AzBio)

|                              | <b>Score Difference,<br/>% points</b> | <b>95% Confidence<br/>Interval</b> | <b>P-value</b> |
|------------------------------|---------------------------------------|------------------------------------|----------------|
| HFE, Unaided – N95, Unaided  | -40.9                                 | -50.1 to -31.6                     | <0.001         |
| HFE, Unaided – PAPR, Unaided | -26.1                                 | -34.5 to -17.6                     | <0.001         |
| HFE, Unaided – HFE, Aided    | -32.3                                 | -40.7 to -23.8                     | <0.001         |
| HFE, Unaided – N95, Aided    | -36.3                                 | -45.6 to -27.1                     | <0.001         |
| HFE, Unaided – PAPR, Aided   | -36.0                                 | -44.4 to -27.5                     | <0.001         |
| N95, Unaided – PAPR, Unaided | 14.8                                  | 5.5 to 24.0                        | <0.001         |
| N95, Unaided – HFE, Aided    | 8.6                                   | -0.7 to 17.8                       | 0.090          |
| N95, Unaided – N95, Aided    | 4.5                                   | -5.2 to 14.3                       | 0.924          |
| N95, Unaided – PAPR, Aided   | 4.9                                   | -4.3 to 14.2                       | 0.823          |
| PAPR, Unaided – HFE, Aided   | -6.2                                  | -14.7 to 2.3                       | 0.351          |
| PAPR, Unaided – N95, Aided   | -10.2                                 | -19.5 to -1.0                      | 0.020          |
| PAPR, Unaided – PAPR, Aided  | -9.9                                  | -18.3 to -1.4                      | 0.011          |
| HFE, Aided – N95, Aided      | -4.0                                  | -13.3 to 5.2                       | 0.954          |
| HFE, Aided – PAPR, Aided     | -3.7                                  | -12.1 to 4.8                       | 0.955          |
| N95, Aided – PAPR, Aided     | 0.4                                   | -8.9 to 9.6                        | 1.000          |

Abbreviations: PAPR, Powered Air Purifying Respirator; HFE, half-face elastomeric. Unaided: Tested without the use of the in-ear communication device. Aided: Tested with the use of the in-ear communication device.

**eTable 3.** Pairwise Comparisons for NASA Task Load Index (NASA-TLX)

|                              | <b>Overall Workload Difference</b> | <b>95% Confidence Interval</b> | <b>P-value</b> |
|------------------------------|------------------------------------|--------------------------------|----------------|
| HFE, Unaided – N95, Unaided  | 51.7                               | 32.7 to 70.6                   | <0.001         |
| HFE, Unaided – PAPR, Unaided | 24.2                               | 7.4 to 40.9                    | <0.001         |
| HFE, Unaided – HFE, Aided    | 38.4                               | 23.5 to 53.3                   | <0.001         |
| HFE, Unaided – N95, Aided    | 46.7                               | 27.8 to 65.7                   | <0.001         |
| HFE, Unaided – PAPR, Aided   | 42.6                               | 25.8 to 59.3                   | <0.001         |
| N95, Unaided – PAPR, Unaided | -27.5                              | -47.3 to -7.7                  | 0.001          |
| N95, Unaided – HFE, Aided    | -13.3                              | -32.2 to 5.7                   | 0.427          |
| N95, Unaided – N95, Aided    | -5.0                               | -26.0 to 16.1                  | 1.000          |
| N95, Unaided – PAPR, Aided   | -9.1                               | -28.9 to 10.7                  | 0.932          |
| PAPR, Unaided – HFE, Aided   | 14.2                               | -2.5 to 31.0                   | 0.164          |
| PAPR, Unaided – N95, Aided   | 22.6                               | 2.8 to 42.3                    | 0.015          |
| PAPR, Unaided – PAPR, Aided  | 18.4                               | 0.4 to 36.4                    | 0.041          |
| HFE, Aided – N95, Aided      | 8.3                                | -10.6 to 27.3                  | 0.953          |
| HFE, Aided – PAPR, Aided     | 4.2                                | -12.6 to 20.9                  | 1.000          |
| N95, Aided – PAPR, Aided     | -4.2                               | -23.9 to 15.6                  | 1.000          |

Abbreviations: PAPR, Powered Air Purifying Respirator; HFE, half-face elastomeric. Unaided: Tested without the use of the in-ear communication device. Aided: Tested with the use of the in-ear communication device.

**eTable 4.** Completed Conditions for Each Participant

|                | MRT |      |     | AzBio |      |     | NASA-TLX |      |     |
|----------------|-----|------|-----|-------|------|-----|----------|------|-----|
|                | N95 | PAPR | HFE | N95   | PAPR | HFE | N95      | PAPR | HFE |
| Participant ID |     |      |     |       |      |     |          |      |     |
| 01             | X   |      | X   | X     | X    | X   | X        |      | X   |
| 02             |     |      | X   |       | X    | X   |          |      | X   |
| 03             |     | X    | X   |       | X    | X   |          | X    | X   |
| 04             |     | X    | X   |       | X    | X   |          | X    | X   |
| 05             | X   | X    | X   | X     | X    | X   | X        | X    | X   |
| 06             | X   | X    | X   | X     | X    | X   | X        | X    | X   |
| 07             | X   | X    | X   | X     | X    | X   | X        | X    | X   |
| 08             | X   | X    | X   | X     | X    | X   | X        | X    | X   |
| 09             | X   | X    | X   | X     | X    | X   | X        | X    | X   |
| 10             | X   | X    | X   | X     | X    | X   | X        | X    | X   |
| 11             | X   | X    | X   | X     | X    | X   | X        | X    | X   |
| 12             | X   | X    | X   | X     | X    | X   | X        | X    | X   |
| n =            | 9   | 10   | 12  | 9     | 12   | 12  | 9        | 10   | 12  |

Abbreviations: MRT, modified rhyme test; AzBio, AzBio sentence test; NASA-TLX, NASA task load index; PAPR, Powered Air Purifying Respirator; HFE, half-face elastomeric
